## RESPIRATORY AND CIRCULATORY ADJUSTMENTS DURING AQUATIC TREADMILL EXERCISE IN THE EUROPEAN SHORE CRAB *CARCINUS MAENAS*

BY N. M. HAMILTON\* AND D. F. HOULIHAN

Department of Zoology, University of Aberdeen, Tillydrone Avenue, Aberdeen,  
Scotland AB9 2TN

Accepted 13 September 1991

### Summary

*Carcinus maenas* (L.) were exercised using a novel design of aquatic treadmill respirometer. Tethered exercise was performed in sea water at  $5.8 \text{ m min}^{-1}$  for 5 min. The rate of oxygen consumption and the heart and scaphognathite beat rates increased at the onset of exercise, reaching a steady state within 180 s. The estimated haemolymph flow rate rose 2.6-fold during exercise, achieved by a 1.8-fold increase in heart rate and a 1.5-fold increase in the estimated cardiac stroke volume. The haemolymph total oxygen content difference increased significantly during exercise. Haemolymph total carbon dioxide content did not change significantly during exercise, but haemolymph pH decreased as a result of an L-lactate-induced metabolic acidosis. The acidosis may also have led to a reduced Bohr shift. It is concluded that  $\text{O}_2$  and  $\text{CO}_2$  exchange were not impaired during exercise and that *C. maenas* relied primarily upon  $\text{O}_2$  to fuel underwater running at  $5.8 \text{ m min}^{-1}$ .

### Introduction

Underwater locomotion, often involving slow-speed walking, is one of the characteristic features of marine Brachyura. Despite this, physiological changes during such activities have been studied in only a few brachyuran species (Houlihan and Innes, 1984), including *Carcinus maenas* (Houlihan *et al.* 1984; Houlihan and Mathers, 1985). These studies were primarily concerned with locomotory energetics, so many of the physiological changes occurring during exercise remain unknown. In these studies, a constant walking speed could not be induced as a probe was used to stimulate walking.

The present study was therefore designed to provide new information about changes in the physiology of *Carcinus maenas* during quantified submaximal

\* Present address: CTI Centre for Biology, Donnan Laboratories, University of Liverpool, Liverpool, L69 3BX.

Key words: *Carcinus maenas*, crabs, exercise, respiration, circulation, treadmill.

exercise. Accurate control of the intensity and duration of exercise was achieved using a novel design of aquatic treadmill respirometer.

In addition, the data in the present study allow a better quantitative comparison to be made with the much larger volume of literature available on land crabs exercised in air. The evolution of crab air-breathing has resulted in a transition from diffusion-limited gills to perfusion-limited respiratory structures. This change, combined with the problems of desiccation and CO<sub>2</sub> excretion that land crabs potentially face (Innes and Taylor, 1986c), could conceivably lead to major differences in the response to exercise between aquatic and terrestrial crab species.

### Materials and methods

#### *Animals*

*Carcinus maenas* (L.) of both sexes were collected from around the coast of Aberdeen, Scotland. The animals were held in recirculating seawater aquaria at the experimental temperature of 15°C (salinity 31‰) for a maximum of 1 week. A short captivity time was desirable as the exercise performance of *C. maenas* declines with an increase in captivity time (Houlihan and Mathers, 1985). All animals had a complete complement of legs and chelae and were at the intermoult stage (Drach and Tchernigovtzeff, 1967). The mean dry mass of the animals was  $12.01 \pm 0.76$  g ( $34.38 \pm 3.09$  g live mass;  $N=137$ ).

#### *The respirometer*

Animals were exercised in a closed-system treadmill respirometer filled with sea water (total volume 2.97 l) (Fig. 1). During the observation periods, water was continuously circulated within the respirometer by the pump and the stirrer. The effect, if any, that turbulence may have had upon the exercise performance of the animal was not assessed. Following observation periods, a rubber bung in the roof of the respirometer could be opened, allowing the apparatus to be flushed with fresh, filtered sea water.

The animals were tethered to a balance arm and the counter-balance was adjusted so that the animals ran with a gait stereotypical of freely moving *C. maenas* (Bethe, 1930; Clarac and Coulmance, 1971). Free walking proved repeatedly unsuccessful as the animals allowed themselves to be dragged along by the treadmill belt.

Mixing time was assessed by injecting dye into the respirometer at a position close to where the animal's exhalant opening would normally be. After injection, 1 ml water samples were withdrawn from the sensor housing (Fig. 1) at 15 s intervals. During the experiment, water was continuously circulated within the respirometer by the pump and stirrer. The absorbance of the samples was measured at 580 nm (peak absorbance) and plotted against time. These data suggested that complete mixing was achieved within 50 s.

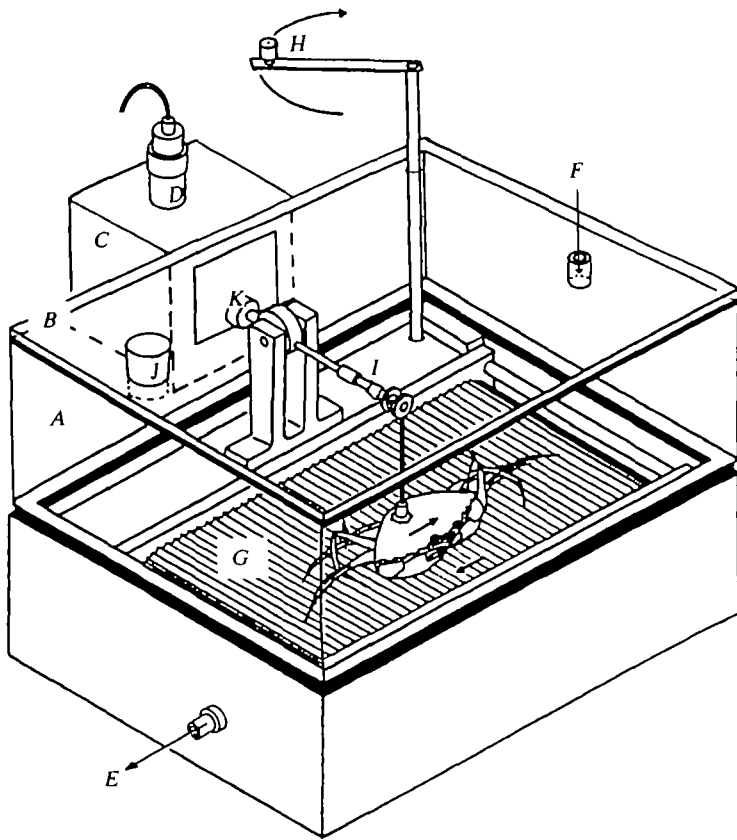

Fig. 1. Diagram of the treadmill respirometer. The respirometer was made of clear Perspex. The entire unit was submerged in a bath of sea water at 15°C. A, outer respirometer wall; B, removable roof; C, oxygen sensor housing containing oxygen sensor (D) and magnetic stirring bar (not shown). A submerged stirrer rotated the bar underneath the sensor, ensuring good mixing of water. Mixing was enhanced by circulating water from the output (E) to the input (F) using an external pump (not shown). The circulating circuit could be altered to flush fresh sea water through the respirometer as required. The animal was exercised on a ridged rubber belt (G) driven by the hand-turned handle (H) via a system of gears. The animal was tethered to a balance arm (I), which allowed limited vertical and horizontal rotation. The arm position could be altered vertically using the counterbalance (K). The rubber bung (J) was removed when flushing the respirometer with fresh sea water.

#### Oxygen consumption measurement

The output from the oxygen sensor was fed into the analogue-to-digital converter of a BBC microcomputer (Acorn Computers Ltd; see Hamilton, 1987, for computer program). The computer was used to calculate and store the value of  $\dot{M}_{O_2}$  for each 1 min period of observation. Sensor drift was checked at the end of the experiment by comparing the computer-calculated  $P_{O_2}$  value to the  $P_{O_2}$  reading of the respirometer water measured using an independently calibrated

oxygen measurement cell. No problems with oxygen sensor drift were noted. At the end of each experiment,  $\dot{M}_{O_2}$  was determined for 15 min without the animal in the respirometer (blank run). The blank value of  $\dot{M}_{O_2}$  was then subtracted from the measured  $\dot{M}_{O_2}$  of the animal. As filtered, fresh sea water was flushed through the respirometer prior to  $\dot{M}_{O_2}$  determination during each experimental period, the value of the blank was found to be negligible and was not considered to be a source of measurement error.

### *Experimental regimes*

The animals were allowed to rest, tethered, in the respirometer for a minimum of 12 h before determining the  $\dot{M}_{O_2}$  of the resting animal over a 60 min period (pre-exercise value). The animal was then exercised at  $5.8 \text{ m min}^{-1}$  for 5 min (sub-burst speed walking for *C. maenas*; Houlihan *et al.* 1984). Following exercise,  $\dot{M}_{O_2}$  was monitored until the pre-exercise value was reached. Fresh filtered sea water was flushed through the respirometer between observation periods to maintain the respirometer  $P_{O_2}$  above 80 % saturation. Experiments in which the animals were active for more than 2 min in any 5 min time block during the pre-exercise or post-exercise periods were aborted. Any animal that hesitated during exercise for more than 60 s was discarded.

Each animal was only used once. In some cases  $\dot{M}_{O_2}$ , heart rate or scaphognathite beat rate alone was monitored. In others, combinations of heart rate measurement, scaphognathite beat rate measurement, ventilatory water flow rate estimation and haemolymph variables were measured. The data from these different combinations have been pooled as no statistically significant differences were found when the same variables were compared between groups ( $P > 0.01$  in each case).

### *Oxygen consumption and mass relationships*

In another series of experiments the relationship between mass and resting or peak  $\dot{M}_{O_2}$  of *C. maenas* was investigated. Prior to  $\dot{M}_{O_2}$  determination, the animals were allowed to rest as described above. Resting  $\dot{M}_{O_2}$  was then determined with the animals untethered. Peak oxygen consumption rates were considered to represent maximal oxygen consumption rates ( $\dot{M}_{O_2\text{max}}$ ) and were induced by tethering the animals to the balance arm and repeatedly stimulating the animals with a probe.  $\dot{M}_{O_2\text{max}}$  was considered to have been achieved when the three highest  $\dot{M}_{O_2}$  readings were observed over three consecutive minutes.

### *Ventilation and circulation*

#### *Heart and ventilation rates*

Impedance techniques were used to measure heart ( $f_H$ ) and scaphognathite ( $f_{\text{SCAPH}}$ ) beat rates (Ansell, 1973; Depledge, 1978). Using measurements of  $\dot{M}_{O_2}$ , and inspired and expired water  $P_{O_2}$  values, ventilatory water flow rate ( $\dot{V}_w$ ) was estimated using the Fick principle. Expired water was sampled using a respiratory

mask made from a commercially available rubber balloon (Butler *et al.* 1978; Hamilton, 1987).

### Haemolymph gas analysis

Haemolymph was sampled after 12 h of tethered rest or at the end of the fifth minute of the exercise period. Postbranchial haemolymph samples ( $P_{aO_2}$ ) were taken *via* a hole previously drilled above the pericardial sinus on the dorsal side of the carapace. Prebranchial samples were taken *via* the arthroal membrane at the base of the pereopods. Each sample (approximately 0.7 ml) was withdrawn into a chilled plastic syringe, sub-sampled and then the various haemolymph gas variables were measured immediately. Sampling time was less than 60 s.

Haemolymph  $O_2$  tension ( $P_{O_2}$ ) and pH were measured using a BMS3 blood gas analysis system (Radiometer, Copenhagen). Total  $O_2$  content ( $C_{O_2}$ ) was measured using a Lex- $O_2$ -Con TL  $O_2$  content analyzer (Lexington Instruments). 40  $\mu$ l haemolymph samples were used to avoid underestimation of  $O_2$  content (Wood *et al.* 1979). Total  $CO_2$  content ( $C_{CO_2}$ ) was determined by injecting duplicate haemolymph samples (80  $\mu$ l each) into a reaction chamber containing 0.01 mol l<sup>-1</sup> HCl saturated with *n*-octanol and the increase in  $CO_2$  units noted on a PHM 73  $P_{CO_2}$  meter (Radiometer, Copenhagen), pre-calibrated with 10 mmol l<sup>-1</sup> NaHCO<sub>3</sub>.  $C_{CO_2}$  was then calculated as described by Cameron (1971) and Houlihan *et al.* (1982).

$P_{CO_2}$  was calculated using the equation:

$$P_{CO_2} = C_{CO_2} / [(X \times \alpha_{CO_2}) + \alpha_{CO_2}],$$

where  $X$  is the antilogarithm of (pH—apparent first dissociation constant of carbonic acid) and  $\alpha_{CO_2}$  is the solubility coefficient of  $CO_2$  (Truchot, 1976*b*). The values of the constants were for *C. maenas* at 15°C at a salinity of 35‰.

$\dot{V}_b$  was estimated using the values of  $\dot{M}_{O_2}$ ,  $Ca_{O_2}$  and  $Cv_{O_2}$  substituted into the Fick equation. Estimates of  $\dot{V}_b$  obtained this way must be treated with caution because of the absence of a sampling site that yields a truly mixed venous haemolymph sample (Taylor, 1982; Taylor and Greenaway, 1984).

### Oxygen equilibrium curves

Haemolymph oxygen equilibrium curves were determined using pooled (10 animals), declotted, mixed prebranchial and postbranchial haemolymph. Curves were determined for resting, untethered *C. maenas* or for tethered *C. maenas* exercised for 5 min at 5.8 mm min<sup>-1</sup> by mixing various ratios of oxygenated and deoxygenated haemolymph (BMS2 blood tonometry system, Radiometer; Copenhagen and Wöstoff gas-mixing pumps, Wöstoff, Germany).  $P_{O_2}$ ,  $C_{O_2}$ ,  $C_{CO_2}$  and the pH of each mixed sample were determined as described above. The oxygen-carrying capacity of the haemolymph ( $C_{O_2max}$ ) was determined for each pooled sample after equilibration with air at 15°C. The lactate concentration was also measured (see below).  $P_{50}$  values were derived from Hill plot regression equations.

### *Lactate concentration measurements*

Whole-body L-lactate concentration was measured in untethered animals, animals that had been tethered for 20 min and animals that had been exercised at  $5.8 \text{ min}^{-1}$  for 5 min. Haemolymph L-lactate concentrations of resting and exercised animals was also measured in some cases. L-Lactate concentrations were determined using a specific spectrophotometric assay (Sigma diagnostic kit no. 826-UV; Sigma Chemical Co. Ltd), modified as suggested by Full and Herreid (1984).

### *Statistical analysis*

Parametric statistical tests were performed according to formulae outlined by Snedecor and Cochran (1972) and Sokal and Rohlf (1969). The 5% level of statistical significance has been used throughout.

## **Results**

### *Response to exercise*

#### *Steady state*

At the onset of exercise,  $\dot{M}_{\text{O}_2}$ ,  $f_{\text{H}}$  and  $f_{\text{SCAPH}}$  increased until a steady state was achieved (Table 1, Fig. 2). The half-times for these responses were  $91 \pm 8 \text{ s}$ ,  $73 \pm 4 \text{ s}$  and  $72 \pm 6 \text{ s}$ , respectively. The mean half-time of the  $\dot{M}_{\text{O}_2}$  response was significantly slower (one-tailed  $t$ -test;  $P < 0.05$ ) than the mean half-times of the heart and scaphognathite response for the same animal. This discrepancy was probably due to inherent delay in the measuring system.

At steady state, the  $\dot{M}_{\text{O}_2}$  had increased 3.4-fold ( $N=10$  animals).  $\dot{V}_{\text{w}}$  was estimated to have increased by 3.5-fold (Table 2,  $N=4$  animals), resulting from the 3.7-fold increase in  $f_{\text{SCAPH}}$  ( $N=8$  animals). The  $\dot{M}_{\text{O}_2}$  of animals wearing the mask was not significantly different from that of unmasked animals ( $P > 0.01$ ). As the scaphognathite of *C. maenas* is known to be a variable-volume pump (Wilkens *et al.* 1984; Mercier and Wilkens, 1984), scaphognathite stroke volume ( $V_{\text{s}}$ ) changes may also have contributed to the  $\dot{V}_{\text{w}}$  increase.

#### *Ventilation*

The  $\dot{V}_{\text{w}}$  increase ensured a large  $P_{\text{O}_2}$  gradient between the water and haemolymph. This diffusion gradient into the haemolymph would have been further enhanced by the 0.59 kPa decrease in the prebranchial haemolymph  $\text{O}_2$  tension ( $N=7$  animals). The convection requirement for water ( $\dot{V}_{\text{w}}/\dot{V}_{\text{O}_2}$ ) was maintained during exercise ( $N=4$  animals), and no significant change in the percentage of  $\text{O}_2$  extracted from the ventilatory current (% $\text{Extr}_{\text{w}}$ ) was noted (Table 2). This suggests that any increase in the physiological, anatomical or diffusional dead space resulting from the increase in  $\dot{V}_{\text{w}}$  did not create an  $\text{O}_2$  transport problem during exercise.

Table 1. Measured variables ( $\pm$ s.e.m.) for *Carcinus maenas* prior to exercise and during steady-state exercise at  $5.8 \text{ m min}^{-1}$ 

| Variable                                                                              | Pre-exercise          | Exercise              | Significance |
|---------------------------------------------------------------------------------------|-----------------------|-----------------------|--------------|
| $\dot{M}_{\text{O}_2}$ ( $\mu\text{mol O}_2 \text{ g}^{-1} \text{ dry mass h}^{-1}$ ) | 7.14 $\pm$ 0.45 (10)  | 24.10 $\pm$ 0.45 (10) | $P < 0.002$  |
| $f_{\text{H}}$ (beats $\text{min}^{-1}$ )                                             | 84.4 $\pm$ 2.2 (14)   | 150.9 $\pm$ 1.1 (14)  | $P < 0.002$  |
| $f_{\text{SCAPH}}$ (total) (beats $\text{min}^{-1}$ )                                 | 206.3 $\pm$ 5.9 (8)   | 769.6 $\pm$ 4.3 (8)   | $P < 0.002$  |
| $P_{\text{I O}_2}$ (kPa)                                                              | 18.50 $\pm$ 0.36 (4)  | 18.14 $\pm$ 0.17 (4)  | NS           |
| $P_{\text{E O}_2}$ (kPa)                                                              | 14.80 $\pm$ 0.71 (4)  | 15.00 $\pm$ 0.28 (4)  | NS           |
| $P_{\text{a O}_2}$ (kPa)                                                              | 10.30 $\pm$ 0.70 (10) | 8.97 $\pm$ 0.59 (8)   | NS           |
| $P_{\text{v O}_2}$ (kPa)                                                              | 1.39 $\pm$ 0.08 (8)   | 0.80 $\pm$ 0.07 (7)   | $P < 0.002$  |
| $\text{Ca}_{\text{O}_2}$ (mmol $\text{O}_2 \text{ l}^{-1}$ haem)                      | 0.63 $\pm$ 0.02 (9)   | 0.60 $\pm$ 0.02 (7)   | NS           |
| $\text{Cv}_{\text{O}_2}$ (mmol $\text{O}_2 \text{ l}^{-1}$ haem)                      | 0.18 $\pm$ 0.03 (6)   | 0.02 $\pm$ 0.01 (6)   | $P < 0.002$  |
| $\text{Ca-v}_{\text{O}_2}$ (mmol $\text{O}_2 \text{ l}^{-1}$ haem)                    | 0.44 $\pm$ 0.01 (6)   | 0.57 $\pm$ 0.02 (6)   | $P < 0.002$  |
| $\text{Ca}_{\text{CO}_2}$ (mmol $\text{CO}_2 \text{ l}^{-1}$ haem)                    | 5.21 $\pm$ 1.13 (4)   | 4.30 $\pm$ 0.26 (4)   | NS           |
| $\text{Cv}_{\text{CO}_2}$ (mmol $\text{CO}_2 \text{ l}^{-1}$ haem)                    | 5.32 $\pm$ 0.24 (4)   | 4.51 $\pm$ 0.32 (4)   | NS           |
| pHa                                                                                   | 7.828 $\pm$ 0.002 (4) | 7.762 $\pm$ 0.018 (4) | $P < 0.01$   |
| pHv                                                                                   | 7.800 $\pm$ 0.005 (4) | 7.729 $\pm$ 0.006 (4) | $P < 0.05$   |
| L-Lactate ( $\mu\text{mol g}^{-1}$ )                                                  | 2.96 $\pm$ 0.28 (15)  | 4.29 $\pm$ 0.38 (15)  | $P < 0.01$   |
| L-Lactate (mmol $\text{l}^{-1}$ haem)                                                 | 3.89 $\pm$ 0.70 (6)   | 9.77 $\pm$ 1.16 (4)   | $P < 0.05$   |

haem, haemolymph; (N), number of animals used in the experiment.

NS, not statistically significant.

$\dot{M}_{\text{O}_2}$ , rate of oxygen consumption;  $f_{\text{H}}$ , heart rate;  $f_{\text{SCAPH}}$ , scaphognathite beat rate;  $P_{\text{I O}_2}$ ,  $P_{\text{O}_2}$  of inhaled water;  $P_{\text{E O}_2}$ ,  $P_{\text{O}_2}$  of exhaled water;  $P_{\text{a O}_2}$ , postbranchial  $P_{\text{O}_2}$ ;  $P_{\text{v O}_2}$ , prebranchial  $P_{\text{O}_2}$ ;  $\text{Ca}_{\text{O}_2}$ , postbranchial oxygen content of the haemolymph;  $\text{Cv}_{\text{O}_2}$ , prebranchial oxygen content;  $\text{Ca-v}_{\text{O}_2}$ , difference between  $\text{Ca}_{\text{O}_2}$  and  $\text{Cv}_{\text{O}_2}$ ;  $\text{Ca}_{\text{CO}_2}$ , postbranchial  $\text{CO}_2$  content;  $\text{Cv}_{\text{CO}_2}$ , prebranchial  $\text{CO}_2$  content; pHa, postbranchial haemolymph pH; pHv, prebranchial haemolymph pH.

### Circulation

The observed 1.8-fold increase in  $f_{\text{H}}$ , coupled with a calculated 2.6-fold increase in  $\dot{V}_{\text{b}}$ , suggests that cardiac stroke volume increased 1.5-fold during steady-state exercise. The ventilation perfusion ratio ( $\dot{V}_{\text{w}}/\dot{V}_{\text{b}}$ ) increased slightly during exercise, indicating that perfusion of the gills was increased to facilitate the increase in available  $\text{O}_2$  at the gills. The efficiency of  $\text{O}_2$  uptake by the haemolymph (% $E_{\text{b O}_2}$ ) increased and the convection requirement for haemolymph ( $\dot{V}_{\text{b}}/V_{\text{O}_2}$ ) decreased as a result of changes in the amount of  $\text{O}_2$  transported and released by the haemolymph (Table 2). The increase in  $\dot{V}_{\text{b}}$  coupled with the maintenance of a high  $\text{Ca}_{\text{O}_2}$ , resulted in an increase in the amount of  $\text{O}_2$  transported by the haemolymph to the tissues during exercise, as indicated by the capacity rate increase ( $\dot{V}_{\text{b}} \times \text{Ca}_{\text{O}_2}$ ).

### Haemolymph gas

Postbranchial  $\text{O}_2$  content and tension did not change significantly during exercise ( $P > 0.05$  in each case;  $N=7$  and 8 animals, respectively; see Table 1). In contrast, prebranchial  $\text{O}_2$  content and tension values after exercise were signifi-

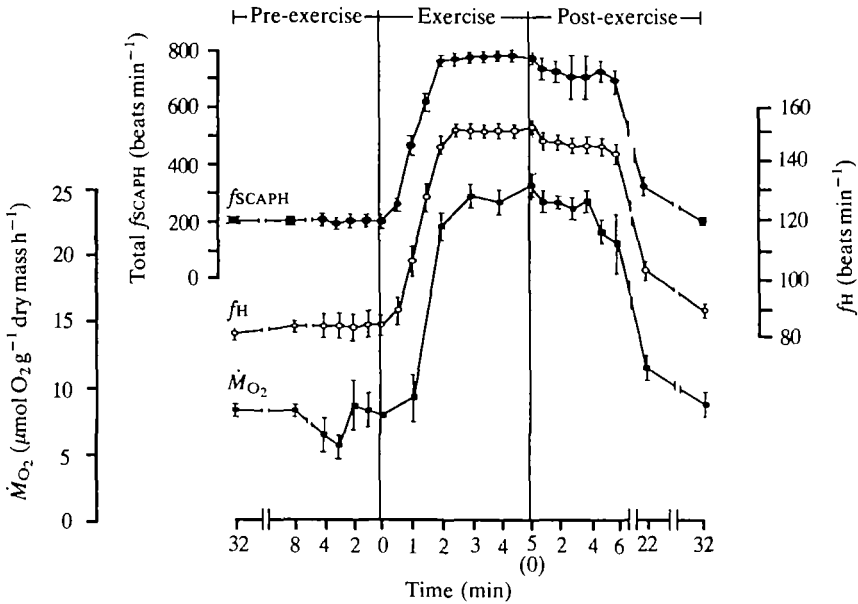

Fig. 2. Mean ( $\pm$ S.E.M.)  $\dot{M}_{O_2}$ ,  $f_H$  and  $f_{SCAPH}$  of *Carcinus maenas* exercised in the treadmill respirometer at  $5.8 \text{ m min}^{-1}$  for 5 min, plotted as a function of time. The pre-exercise and post-exercise periods were divided into 5-min time blocks. Each block consisted of five 1-min observations made for each animal. The observations in a time block were pooled and the mean was plotted against the third minute in the time block. In the case of the exercise period, the time blocks span 1 min ( $\dot{M}_{O_2}$ ) or 30 s ( $f_H$  and  $f_{SCAPH}$ ), with each block consisting of one observation per animal.

cantly different from the pre-exercise values ( $P < 0.002$  in each case;  $N = 6$  and 7 animals, respectively). The  $Ca - v_{O_2}$  difference therefore increased during exercise ( $P < 0.002$ ).

Under pre-exercise conditions, the haemocyanin transported 78% of the  $O_2$  to the tissues. During exercise, the haemocyanin transported 84% of the  $O_2$  to the tissues; however, this is not a statistically significant difference ( $P > 0.05$ ).

Of the  $O_2$  made available to the tissues, 71.8% diffused from the haemolymph to the tissues (% $\text{Extr}_b$ ) during the pre-exercise period, rising to 96.6% during exercise. An increase in % $\text{Extr}_b$ , despite an increase in  $\dot{V}_b$  as noted in *C. maenas*, is a typical crustacean response to exercise (McMahon, 1981; McMahon *et al.* 1979).

#### Haemolymph pH

Both post- and prebranchial pH values ( $N = 4$  animals in each case) decreased significantly as a result of exercise ( $P < 0.01$  and  $P < 0.05$ , respectively).  $\text{CO}_2$  content did not change significantly as a result of exercise ( $N = 4$  animals in each case). The estimated pre-exercise values for postbranchial and prebranchial  $\text{CO}_2$



Table 2. Calculated variables and indices for *Carcinus maenas* prior to exercise and during steady-state exercise at  $5.8 \text{ m min}^{-1}$ 

| Variable                                                                               | Pre-exercise  | Exercise                    |
|----------------------------------------------------------------------------------------|---------------|-----------------------------|
| $\dot{V}_w$ (ml $\text{H}_2\text{O g}^{-1} \text{ h}^{-1}$ )                           | 154.7±5.0 (4) | 546.4±8.8 (4)***            |
| $\dot{V}_b$ (ml haem $\text{min}^{-1}$ )†                                              | 3.2           | 8.3                         |
| $V_s$ (ml haem $\text{beat}^{-1}$ )†                                                   | 0.04          | 0.06                        |
| % Extr <sub>w</sub> (%)                                                                | 20.3±3.8 (4)  | 18.4±0.8 (4) <sup>NS</sup>  |
| % Extr <sub>b</sub> (%)                                                                | 71.8±3.2 (6)  | 96.6±1.5 (6)***             |
| $(\dot{V}_w/\dot{V}_{\text{O}_2})$ (l $\text{H}_2\text{O ml}^{-1} \text{ O}_2$ )       | 1.06±0.18 (4) | 1.07±0.04 (4) <sup>NS</sup> |
| $(\dot{V}_w/\dot{V}_b)$ † (ml $\text{H}_2\text{O ml}^{-1}$ haem)                       | 9.7           | 13.2                        |
| $(\dot{V}_b/\dot{V}_{\text{O}_2})$ † (ml haem $\text{ml}^{-1} \text{ O}_2$ )           | 99.3          | 77.0                        |
| $(\dot{V}_b \times \text{Ca}_{\text{O}_2})$ † ( $\mu\text{mol O}_2 \text{ min}^{-1}$ ) | 2.00          | 4.99                        |
| % $E_{w\text{O}_2}$ (%)†                                                               | 22.0          | 19.1                        |
| % $E_{b\text{O}_2}$ (%)†                                                               | 64            | 81                          |

haem, haemolymph.

(N), number of animals used in the experiment; NS, not statistically significant.

† Calculated for a 12.01 g dry mass animal (mean dry mass in this study).

\*\*\* Statistically significant difference,  $P < 0.002$ .

$\dot{V}_w$ , rate of water flow through the gills;  $\dot{V}_b$ , haemolymph flow rate;  $V_s$ , stroke volume; % Extr, percentage extraction of oxygen from the water (w) or haemolymph (b);  $\dot{V}_{\text{O}_2}$ , rate of oxygen uptake;  $\text{Ca}_{\text{O}_2}$ , postbranchial oxygen content of haemolymph; %  $E_{b\text{O}_2}$ , effectiveness of oxygen uptake by the tissues; %  $E_{w\text{O}_2}$ , effectiveness of oxygen uptake from the water.

tension were 0.21 kPa and 0.24 kPa, respectively. There was no significant change in these values following exercise ( $P_{a\text{CO}_2} = 0.25 \text{ kPa}$ ,  $P_{v\text{CO}_2} = 0.28 \text{ kPa}$ ).

#### L-Lactate concentrations

Five minutes of exercise resulted in a significant 1.4-fold increase in whole-body L-lactate concentration ( $P < 0.01$ ;  $N = 15$  animals) and a significant 2.5-fold increase in haemolymph L-lactate concentration ( $P < 0.05$ ;  $N = 4$  animals; see Table 1). Anaerobiosis accounted for 29% of the total ATP production during exercise, calculated using ATP equivalents (Bennett and Licht, 1972).

#### Oxygen equilibrium curves

Prior to exercise, haemolymph  $P_{50}$  was 1.68 kPa (12.6 Torr) at a pH of 7.798. After 5 min of exercise,  $P_{50}$  had increased to 2.08 kPa (15.6 Torr) at a pH of 7.733, resulting in a Bohr shift of  $-1.43$  (Fig. 3). The estimated  $P_{\text{CO}_2}$  values at  $P_{50}$  of the haemolymph were 0.23 kPa (1.7 Torr) for the pre-exercise samples and 0.24 kPa (1.8 Torr) for the samples from exercised animals. Cooperativity decreased from 4.8 to 3.9. No Root effect was exhibited by either of the pooled haemolymph samples.

#### Post-exercise response

After exercise,  $\dot{M}_{\text{O}_2}$ ,  $f_H$  and  $f_{\text{SCAPH}}$  decreased, eventually reaching the original

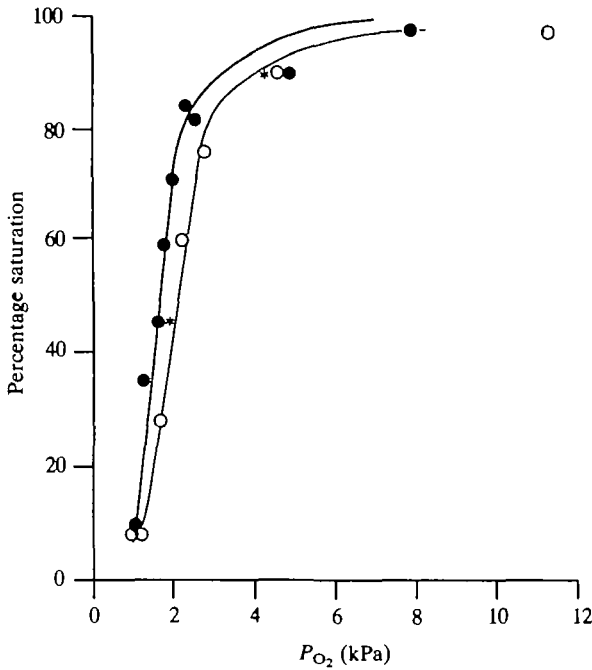

Fig. 3. *In vitro* haemolymph oxygen equilibrium curves for *Carcinum maenas* expressed as percentage saturation. (●) Pre-exercise conditions; (○) exercised for 5 min at  $5.8 \text{ m min}^{-1}$ . Two overlapping data points are indicated by an asterisk.

pre-exercise value. The half-times for these responses were  $752 \pm 67 \text{ s}$ ,  $771 \pm 63 \text{ s}$  and  $1030 \pm 245 \text{ s}$ , respectively (each significantly longer than the corresponding half-time at the beginning of exercise,  $P < 0.002$ ; paired *t*-test).

#### Oxygen consumption and live mass

The relationship between the rate of oxygen consumption and live mass has been expressed in units of  $\text{ml O}_2 \text{ animal}^{-1} \text{ h}^{-1}$  ( $\dot{V}_{O_2}$ ) to allow easy comparison with the relationships noted in the established literature. The  $\dot{V}_{O_2}$  values of resting and maximally exercised animals were linearly related to live mass (Fig. 4). The slopes of the two lines are not significantly different ( $P > 0.05$ ; *F* slope = 0.033) whereas the elevations are significantly different ( $P < 0.05$ ; *F* elevation = 337.47). The relationship between resting  $\dot{V}_{O_2}$  and mass was:  $\log \dot{V}_{O_2 \text{ rest}} (\text{ml O}_2 \text{ animal}^{-1} \text{ h}^{-1}) = 0.655 \times \log(\text{live mass in grams}) - 0.706$ ; ( $r = 0.85$ ;  $N = 32$ ;  $P < 0.01$ ).

The relationship between maximal  $\dot{V}_{O_2}$  and mass was:  $\log \dot{V}_{O_2 \text{ max}} (\text{ml O}_2 \text{ animal}^{-1} \text{ h}^{-1}) = 0.704 \times \log(\text{live mass in grams}) - 0.116$ ; ( $r = 0.88$ ;  $N = 12$ ;  $P < 0.05$ ). The aerobic expansibility (ratio of  $\dot{V}_{O_2 \text{ max}}$  to  $\dot{V}_{O_2 \text{ rest}}$ ) was 4.6 for the mean live mass of animal used in the exercise experiments.

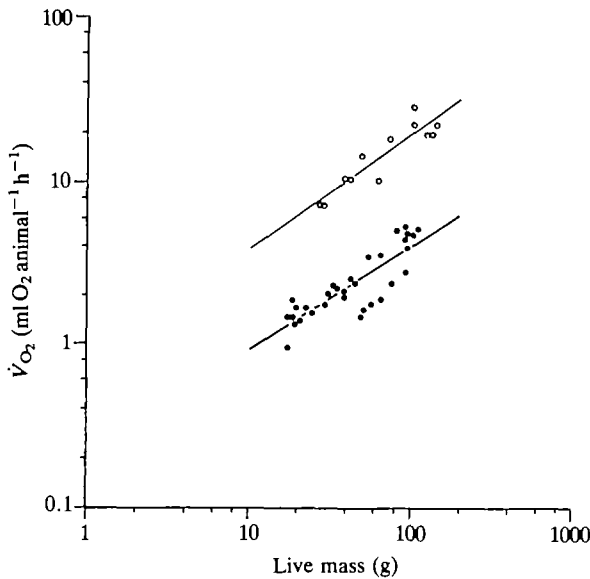

Fig. 4.  $\dot{V}_{O_2}$  of resting and maximally respiring *Carcinus maenas* at 15°C plotted as a function of live mass. Lines were fitted by least-squares regression analysis. (●) Resting animals ( $N=32$ ); (○) maximally respiring animals ( $N=12$ ).

## Discussion

### *Response to exercise*

#### *Oxygen consumption*

$\dot{M}_{O_2}$  increased at the onset of exercise and rapidly reached a steady state (Fig. 2). This is characteristic of primarily aerobically dependent decapod crustaceans running in air (Full, 1987; Full and Herreid, 1983; Herreid, 1981; Herreid *et al.* 1979) and primarily aerobic vertebrates and insects (Brackenbury and Avery, 1980; Cerretelli *et al.* 1977; Chadwick and Gilmour, 1940; Krough and Weis-Fogh, 1951; Morton, 1985). The latter animals usually have high aerobic expansibility values ranging up to 20 times resting  $\dot{M}_{O_2}$  value (Brett, 1964; Pasquis *et al.* 1970; Priede, 1985; Schmidt-Nielsen, 1984; Thomas, 1975). Like vertebrates, primarily aerobically dependent crustaceans have higher aerobic expansibility values than more anaerobically reliant species (see Hamilton, 1987, for a brief review), although comparison is difficult as truly basal metabolic rates have not been measured in the majority of crustacean studies. Aerially respiring *Ocypode* spp., renowned as the world's fastest crustaceans (Hafemann and Hubbard, 1969), have expansibilities between 6.4 to 11.9 times the resting rate (Full, 1987; Full and Herreid, 1983). In contrast, the land crab *Sesarma cinereum* has an expansibility of just 1.5 times the resting rate, a very limited exercise capability and a heavy reliance upon anaerobiosis during exercise (Full *et al.* 1985). *C. maenas* fits somewhere between these two species, with an expansibility of 4.7 for a 50 g live mass animal (Fig. 4).

In *C. maenas* the expansibility was relatively constant (4.4–4.8) over a mass range of 10 g to 100 g live mass. In contrast, aerobic metabolic scope ( $\dot{M}_{O_2\max} - \dot{M}_{O_2\text{rest}}$ ) increases progressively with body mass (0.17 mmol O<sub>2</sub> g<sup>-1</sup> live mass h<sup>-1</sup> to 0.70 mmol O<sub>2</sub> g<sup>-1</sup> live mass h<sup>-1</sup>; 3.9 ml O<sub>2</sub> g<sup>-1</sup> live mass h<sup>-1</sup> to 15.5 ml O<sub>2</sub> g<sup>-1</sup> live mass h<sup>-1</sup>) over the same mass range (Fig. 4). Consistent with this relationship is the observation that aerobic metabolic enzymes in this species all scale with exponents that are not significantly different from those of the resting and  $\dot{M}_{O_2\max}$  regression lines (N. M. Hamilton and D. F. Houlihan, personal observation). The scaling of aerobic scope has been reported to be mass-dependent in many crabs (Houlihan *et al.* 1984, 1985; Innes *et al.* 1986). Such scaling effects must be investigated if meaningful comparisons of crab exercise performance are to be made using  $\dot{M}_{O_2\max}$  as an indication of aerobic capacity.

### Ventilation

With an increase in  $\dot{M}_{O_2}$ , there was a concomitant increase in  $f_{\text{SCAPH}}$  and  $\dot{V}_W$  of *C. maenas* (Fig. 2). This is a typical response to exercise in *Cancer magister* (McDonald, 1977; McMahan *et al.* 1979) and *Callinectes sapidus* (Booth *et al.* 1982; McMahan and Wilkens, 1983). In these three species, and in the aerially respiring crabs *Cardisoma guanhumii* (Herreid *et al.* 1979) and *Cardisoma carnifex* (Wood and Randall, 1981a), increases in ventilation volume contribute more to increased O<sub>2</sub> provision than do increases in the percentage of O<sub>2</sub> extracted from the respiratory medium. In contrast, the %Extr<sub>a</sub> increases much more than the rate of air flow through the gills during exercise in *Gecarcinus lateralis* (Herreid *et al.* 1983).

### Circulation

The cardiac response of submerged *C. maenas* to exercise, in which  $f_H$  increases more than  $V_s$  (Tables 1 and 2), is the opposite to its cardiac response at rest in progressively increasing external hypoxia (Taylor, 1976; Taylor and Butler, 1978).  $f_H$  also shows a greater proportional increase than  $V_s$  during exercise in *Callinectes sapidus* (Booth *et al.* 1982) and in the lobster *Homarus vulgaris* (Hamilton, 1987). In contrast, the proportional increase in  $V_s$  is greater than that of  $f_H$  during exercise in *Carcinus mediterraneus* and *Pachygrapsus marmoratus* (Houlihan and Innes, 1984), *Cancer magister* (McMahan *et al.* 1979) and in the land crab *Cardisoma carnifex* (Wood and Randall, 1981a). A bradycardia in response to exercise in *Cardisoma guanhumii* (Herreid *et al.* 1979) is yet another variation that has been reported. The reason for these differences is not clear.

### Haemolymph gas

No significant decrease in postbranchial O<sub>2</sub> tension and content was noted in *C. maenas* following exercise (Table 1). *C. sapidus* has a similar response (Booth *et al.* 1982). *Cardisoma carnifex* (Wood and Randall, 1981a) and *Cancer magister* (McMahan *et al.* 1979; Johansen *et al.* 1970) have significantly decreased  $P_{aO_2}$

values during exercise; however,  $Ca_{O_2}$  shows little change as the haemocyanin remains virtually fully saturated in each case. In *Carcinus mediterraneus* and *Pachygrapsus marmoratus*, both haemolymph  $O_2$  tension and  $O_2$  content decrease significantly as a result of exercise (Houlihan and Innes, 1984).

The change in the  $Cv_{O_2}$  of *C. maenas* during exercise resulted in an increase in the  $Ca-v_{O_2}$  difference (Table 1). Several other authors have noted an increase in the  $Ca-v_{O_2}$  difference during exercise, primarily as a result of a  $Pv_{O_2}$  decrease (Johansen *et al.* 1970; McMahan *et al.* 1979; Wood and Randall, 1981*b*). *Callinectes sapidus* is a notable exception as its  $Pv_{O_2}$  shows no significant change after 25 min of swimming (Booth *et al.* 1982).

The release of  $O_2$  to the tissues is enhanced in some species by a normal Bohr shift (see McMahan and Wilkens, 1983). In *C. maenas*, the Bohr shift probably plays a minimal role in the release of  $O_2$ . The Bohr shift noted in *C. maenas* exercised at  $5.8 \text{ m min}^{-1}$  was  $-1.43$  (Fig. 3). This is lower than the value of  $-1.54$  reported by Taylor and Butler (1978). The lower value in the former case may have been caused by the L-lactate accumulation opposing the rightward equilibrium curve shift induced by the haemolymph pH drop. L-Lactate is known to modulate the affinity of *C. maenas* haemocyanin *in vitro* (Truchot, 1980). Modulation of  $O_2$ -binding by other haemolymph cofactors during exercise cannot be ruled out (Lallier *et al.* 1987; Morris *et al.* 1985). Cooperativity decreased during exercise. A decrease was also reported in swimming *C. sapidus* (Booth *et al.* 1982); however, the relationships between cooperativity, haemolymph pH and lactate ion concentration are not understood.

The post- and prebranchial haemolymph  $CO_2$  tensions did not change significantly as a result of exercise, suggesting that gas exchange at the respiratory surface was not seriously impaired. This was possibly facilitated by the reduced Bohr shift, which would assist the maintenance of a high  $Pa_{O_2}$ . This, in turn, would aid  $CO_2$  unloading as  $O_2$  uptake and  $CO_2$  excretion are thought to be linked in *C. maenas* (Truchot, 1976*a*). As the  $P_{CO_2}$  difference between the prebranchial and postbranchial haemolymph was small ( $<0.03 \text{ kPa}$ ;  $0.2 \text{ Torr}$ ), unloading of  $CO_2$  would be aided further by the Haldane effect (Truchot, 1976*a*). In contrast, *Callinectes sapidus* and *Cancer magister* both show increases in haemolymph  $CO_2$  tension during exercise (Booth *et al.* 1984; McDonald *et al.* 1979).

Assuming the animals were in acid-base equilibrium at the end of the exercise period, the insignificant changes in haemolymph  $CO_2$  content and calculated  $P_{CO_2}$  suggest that *C. maenas* did not experience a respiratory acidosis during exercise. The significant decrease in haemolymph pH would therefore be due largely to a metabolic acidosis induced by the significant increase in L-lactate concentration. The majority of crab species that have been examined show a mixed metabolic/respiratory acidosis during exercise (McDonald *et al.* 1979; Smatresk and Cameron, 1981; Smatresk *et al.* 1979; Waldron *et al.* 1986; Wheatly *et al.* 1986; Wood and Randall, 1981*a,b*).

The L-lactate concentration increase in *C. maenas* indicates the anaerobiosis contributed 29% of the total ATP equivalent production, as noted in the Results

section. Accumulation of this amount of lactate suggests that the exercise intensity was approaching burst speed levels.

#### *Recovery from exercise*

The recovery from exercise in crustaceans follows a monoexponential curve (Full and Herreid, 1983). The reason why the half-times of the  $\dot{M}_{O_2}$ ,  $f_H$  and  $f_{SCAPH}$  responses were each significantly longer at the end of exercise than at the beginning is not clear. The most likely explanation is that the responses during the recovery period were periodically elevated during the observed short bursts of spontaneous activity (duration <1 min). There is no significant difference between these half-times for  $\dot{M}_{O_2}$  in *Ocypode gaudichaudii* (Full and Herreid, 1983).

#### *Interspecific differences in response to exercise*

The reason why some species of crustaceans show markedly different physiological responses to submaximal exercise remains unclear, largely due to the dearth of information in this field. One contributing factor may be whether the animal relies upon rapid neurophysiological or much slower-acting humoral mechanisms to initiate the ventilatory responses during exercise (Herreid, 1981).

The  $O_2$  diffusion rate across the gills will also be a limiting factor during exercise. The amount of  $O_2$  that can diffuse into the haemolymph will be a function of the magnitude of the  $O_2$  diffusion gradient, the area available for diffusion, the diffusion pathlength and the barrier to diffusion created by the physical structure of the gas exchange apparatus. *Callinectes sapidus* has a relatively large gill area (Gray, 1957) and short diffusion pathlength (Aldridge and Cameron, 1979) compared to many other species of crab (Gray, 1957), including *C. maenas* (Butler, 1976; Taylor and Butler, 1978). These factors may explain why *C. sapidus* has a shorter half-time for  $\dot{M}_{O_2}$  at the beginning of exercise than *C. maenas* (Booth *et al.* 1982).

Associated with adaptation to a terrestrial environment is a reduction in gill surface area (Gray, 1957; Cameron, 1981; Hawkins and Jones, 1982) in addition to the evolution of alternative gas exchange structures (Bliss, 1968, 1979; Diaz and Rodriguez, 1977; Innes and Taylor, 1986c, 1987; El Haj *et al.* 1986; Maitland, 1986). The effect of these morphological adaptations upon exercise performance and the accompanying physiological adjustments are not clear. *Ocypode gaudichaudii* shows exceptional exercise capabilities in air, has a fast half-time for  $\dot{M}_{O_2}$  at the beginning of exercise and reaches a steady state (Full and Herreid, 1983). This may be due to the invaginations of its branchial chamber lining, which act as an accessory respiratory surface (Diaz and Rodriguez, 1977). However, *Pseudosquilla garmani* has evolved an invaginated 'lung', which enables it to achieve the highest  $Pa_{O_2}$  values recorded for crustaceans (approximately 18.7 kPa; Innes and Taylor, 1986a, 1987), but this species does not have exceptional locomotory capabilities (Innes and Taylor, 1986b). Tolerance to desiccation may also determine the exercise responses of aerially respiring species (Innes *et al.* 1986).

The magnitude of phosphate and  $O_2$  stores, in addition to the rate of phosphate

utilization, is also likely to determine the rate of the  $\dot{M}_{O_2}$  response. Unfortunately, accurate information concerning these variables is limited and is of little help in clarifying the reasons for the interspecific differences in response time.

Circulatory response data are also sparse in the literature and there is no clear correlation between physiological responses, habitat and exercise performance. It is worth noting that aquatic crustaceans are diffusion-limited in their  $O_2$  transport, whereas aerially respiring crustaceans are perfusion-limited (reviewed by Innes and Taylor, 1986c). Perfusion limitation may explain the extremely limited exercise capabilities of *Sesarma cinereum*, although the exact nature of the limitation is unknown (Full *et al.* 1985).

The present study has revealed the major ventilatory and circulatory adjustments that occur in *C. maenas* in response to controlled submaximal exercise. These results suggest that  $O_2$  and  $CO_2$  exchange were not impaired during exercise and that *C. maenas* relied primarily upon  $O_2$  to fuel exercise at  $5.8 \text{ m min}^{-1}$ . *C. maenas* shows  $\dot{M}_{O_2}$  responses that are similar to primarily aerobic land crabs. From the aquatic species that have been studied, it would appear that the aquatic medium does not confer any particular advantage to marine crustaceans in terms of exercise performance when compared to aerially respiring species exercised in air. This implies that the evolution of air-breathing in crabs *per se* is not necessarily limiting to exercise performance. Owing to a lack of published information on detailed physiological responses under a controlled exercise regime, the reason for interspecific differences in crustacean exercise response remains unknown.

The authors thank Alastair Innes who helped with the blood gas analysis and the oxygen equilibrium curve determinations. Thanks are also given to Robert Hamilton, Roland Smith and Ron Bisset who constructed the treadmill respirometer. This research was funded by an SERC (UK) grant to N.M.H.

### References

- ALDRIDGE, J. B. AND CAMERON, J. N. (1979).  $CO_2$  exchange in the blue crab, *Callinectes sapidus* (Rathbun). *J. exp. Zool.* **207**, 321–328.
- ANSELL, A. D. (1973). Changes in oxygen consumption, heart rate and ventilation accompanying starvation in the decapod crustacean. *Cancer pagurus*. *Neth. J. Sea Res.* **7**, 455–475.
- BENNETT, A. F. AND LICHT, P. (1972). Anaerobic metabolism during activity in lizards. *J. comp. Physiol.* **81**, 277–288.
- BETHE, A. (1930). Studien über die Plastizität des Nervensystems. I. Mitteilung. Arachnoideen und Crustaceen. *Pflügers Arch. ges. Physiol.* **224**, 793–820.
- BLISS, D. E. (1968). Transition from water to land in decapod crustaceans. *Am. Zool.* **8**, 355–392.
- BLISS, D. E. (1979). From sea to tree: saga of a land crab. *Am. Zool.* **19**, 385–410.
- BOOTH, C. E., McMAHON, B. R., DE FÜR, P. L. AND WILKES, P. R. H. (1984). Acid-base regulation during exercise and recovery in the blue crab, *Callinectes sapidus*. *Respir. Physiol.* **58**, 359–376.
- BOOTH, C. E., McMAHON, B. R. AND PINDER, A. W. (1982). Oxygen uptake and the potentiating effects of increased hemolymph lactate on oxygen transport during exercise in the blue crab, *Callinectes sapidus*. *J. comp. Physiol.* **148**, 111–121.

- BRACKENBURY, J. H. AND AVERY, P. (1980). Energy consumption and ventilatory mechanisms in the exercising fowl. *Comp. Biochem. Physiol.* **66A**, 439–445.
- BRETT, J. R. (1964). The respiratory metabolism and swimming performance of young sockeye salmon. *J. Fish. Res. Bd Can.* **21**, 1183–1226.
- BUTLER, P. J. (1976). Gas exchange. In *Environmental Physiology of Animals* (ed. J. Bligh, J. L. Cloudsley-Thompson and A. G. Macdonald). Oxford: Blackwell.
- BUTLER, P. J., TAYLOR, E. W. AND MCMAHON, B. R. (1978). Respiratory and circulatory changes in the lobster (*Homarus vulgaris*) during long term exposure to moderate hypoxia. *J. exp. Biol.* **73**, 131–146.
- CAMERON, J. N. (1971). Rapid method for determination of total carbon dioxide in small blood samples. *J. appl. Physiol.* **31**, 632–634.
- CAMERON, J. N. (1981). Acid–base response to changes in CO<sub>2</sub> in two Pacific crabs: the coconut crab, *Birgus latro*, and a mangrove crab, *Cardisoma carnifex*. *J. exp. Zool.* **218**, 65–73.
- CERRETELLI, P., SHINDELL, D., PENDERGAST, D. P., DIPRAMPERO, P. E. AND RENNIE, D. W. (1977). Oxygen uptake transients at the onset and offset of arm and leg work. *Respir. Physiol.* **30**, 81–97.
- CHADWICK, L. E. AND GILMOUR, D. (1940). Respiration during flight in *Drosophila repleta* Wollaston: the oxygen consumption considered in relation to the wing rate. *Physiol. Zool.* **13**, 398–410.
- CLARAC, F. AND COULMANCE, M. (1971). La marche latérale du crabe (*Carcinus*). Coordination des mouvements articulaires et régulation proprioceptive. *Z. vergl. Physiol.* **73**, 408–438.
- DEPLEDGE, M. H. (1978). Cardiac activity of the shore crab *Carcinus maenas* (L.). *Comp. Biochem. Physiol.* **60A**, 65–67.
- DIAZ, H. AND RODRIGUEZ, G. (1977). The branchial chamber in terrestrial crabs: a comparative study. *Biol. Bull. mar. biol. Lab., Woods Hole* **153**, 485–504.
- DRACH, P. AND TCHERNIGOVITZEFF, C. (1967). Sur la méthode de détermination des stades d'intermue et son application générale aux crustacés. *Mie et Millieu* **18A**, 595–607.
- EL HAJ, A. J., INNES, A. J. AND TAYLOR, E. W. (1986). Ultrastructure of the pulmonary, cutaneous and branchial gas exchange organs of the Trinidad mountain crab. *J. Physiol., Lond.* **373**, 84P.
- FULL, R. J. (1987). Locomotion and energetics of the ghost crab. I. Metabolic cost and endurance. *J. exp. Biol.* **130**, 137–153.
- FULL, R. J. AND HERREID, C. F. (1983). Aerobic response to exercise of the fastest land crab. *Am. J. Physiol.* **244**, R530–R536.
- FULL, R. J. AND HERREID, C. F. (1984). Fiddler crab exercise: the energetic cost of running sideways. *J. exp. Biol.* **109**, 141–161.
- FULL, R. J., HERREID, C. F. AND ASSAD, J. A. (1985). Energetics of the exercising wharf crab *Sesarma cinereum*. *Physiol. Zool.* **58**, 605–615.
- GRAY, I. E. (1957). A comparative study of the gill area of crabs. *Biol. Bull. mar. biol. Lab., Woods Hole* **112**, 34–42.
- HAFEMANN, D. R. AND HUBBARD, J. I. (1969). On the rapid running of ghost crabs (*Ocypode ceratophthalma*). *J. exp. Zool.* **170**, 25–32.
- HAMILTON, N. M. (1987). Respiratory and circulatory changes accompanying aquatic treadmill exercise of *Carcinus maenas* (L.) and *Homarus vulgaris* (M.E.). PhD thesis. University of Aberdeen, Aberdeen, Scotland.
- HAWKINS, A. J. S. AND JONES, M. B. (1982). Gill area and ventilation in the mud crabs, *Helice crassa* Dana (Grapsidae) and *Macrophthalmus hirtipes* (Jacquinot) (Ocypodidae), in relation to habitat. *J. exp. mar. Biol. Ecol.* **60**, 103–118.
- HERREID, C. F. (1981). Energetics of pedestrian arthropods. In *Locomotion and Energetics in Arthropods* (ed. C. F. Herreid and C. R. Fournier), pp. 491–526. New York, London: Plenum Press.
- HERREID, C. F., LEE, L. W. AND SHAH, G. M. (1979). Respiration and heart rate in exercising land crabs. *Respir. Physiol.* **36**, 109–120.
- HERREID, C. F., O'MAHOONEY, P. N. AND FULL, R. J. (1983). Locomotion in land crabs: respiratory and cardiac response of *Gecarcinus lateralis*. *Comp. Biochem. Physiol.* **74A**, 117–124.
- HOULIHAN, D. F., GOVIND, C. K. AND EL HAJ, A. J. (1985). Energetics of swimming in



- Callinectes sapidus* and walking in *Homarus americanus*. *Comp. Biochem. Physiol.* **82A**, 267–279.
- HOULIHAN, D. F. AND INNES, A. J. (1984). The cost of walking in crabs: aerial and aquatic oxygen consumption during activity of two species of intertidal crab. *Comp. Biochem. Physiol.* **77A**, 325–334.
- HOULIHAN, D. F., INNES, A. J., WELLS, M. J. AND WELLS, J. (1982). Oxygen consumption and blood gases of *Octopus vulgaris* in hypoxic conditions. *J. comp. Physiol.* **148**, 35–40.
- HOULIHAN, D. F. AND MATHERS, E. (1985). Effects of captivity and exercise on the energetics of locomotion and muscle of *Carcinus maenas* (L.). *J. exp. mar. Biol. Ecol.* **92**, 125–142.
- HOULIHAN, D. F., MATHERS, E. AND EL HAJ, A. J. (1984). Walking performance and aerobic and anaerobic metabolism of *Carcinus maenas* (L.) in sea water at 15°C. *J. exp. mar. Biol. Ecol.* **74**, 221–230.
- INNES, A. J., FORSTER, M. E., JONES, M. B., MARSDEN, I. D. AND TAYLOR, H. H. (1986). Bimodal respiration, water balance and acid–base regulation in high-shore crab, *Cyclograpsus lavauxi* H. Milne Edwards. *J. exp. mar. Biol. Ecol.* **100**, 127–145.
- INNES, A. J. AND TAYLOR, E. W. (1986a). An analysis of lung function in the Trinidadian mountain crab. *J. Physiol., Lond.* **372**, 43P.
- INNES, A. J. AND TAYLOR, E. W. (1986b). Air breathing crabs of Trinidad: adaptive radiation into the terrestrial environment. I. Aerobic metabolism and habitat. *Comp. Biochem. Physiol.* **85A**, 373–381.
- INNES, A. J. AND TAYLOR, E. W. (1986c). The evolution of air-breathing in crustaceans: A functional analysis of branchial, cutaneous and pulmonary gas exchange. *Comp. Biochem. Physiol.* **85A**, 621–637.
- INNES, A. J. AND TAYLOR, E. W. (1987). Air-breathing in the trinidad mountain crab: a quantum leap in the evolution of the invertebrate lung? *Comp. Biochem. Physiol.* **87A**, 1–8.
- JOHANSEN, K., LENFANT, C. AND MECKLENBURG, T. A. (1970). Respiration in the crab, *Cancer magister*. *Z. vergl. Physiol.* **70**, 1–19.
- KROUGH, A. AND WEIS-FOGH, T. (1951). The respiration exchange of the desert locust (*Schistocerca gregaria*) before, during and after flight. *J. exp. Biol.* **28**, 344–357.
- LALLIER, F., BOITEL, F. AND TRUCHOT, J. P. (1987). The effect of ambient oxygen and temperature on haemolymph L-lactate and urate concentrations in the shore crab *Carcinus maenas*. *Comp. Biochem. Physiol.* **86A**, 255–260.
- MAITLAND, D. P. (1986). Crabs that breathe air with their legs – *Scopimera* and *Dotilla*. *Nature* **19**, 493–495.
- MCDONALD, D. G. (1977). *Respiratory Physiology of the Crab Cancer magister*. PhD thesis. University of Calgary, Calgary, Alberta, Canada.
- MCDONALD, D. G., McMAHON, B. R. AND WOOD, C. M. (1979). An analysis of acid–base disturbances in the haemolymph following strenuous activity in the dungeness crab, *Cancer magister*. *J. exp. Biol.* **79**, 47–58.
- McMAHON, B. R. (1981). Oxygen uptake and acid–base balance during activity in decapod crustaceans. In *Locomotion and Energetics in Arthropods* (ed. C. F. Herreid and C. R. Fournier), pp. 299–335. New York, London: Plenum Press.
- McMAHON, B. R., MCDONALD, D. G. AND WOOD, C. M. (1979). Ventilation, oxygen uptake and haemolymph oxygen transport, following enforced exhausting activity in the dungeness crab *Cancer magister*. *J. exp. Biol.* **80**, 271–285.
- McMAHON, B. R. AND WILKENS, J. L. (1983). Ventilation, perfusion and oxygen uptake. In *Internal Anatomy and Physiological Regulation. The Biology of Crustacea*, vol. 5 (ed. D. E. Bliss and L. H. Mantel), pp. 289–372. New York, London: Academic Press.
- MERCIER, J. A. AND WILKENS, J. L. (1984). Analysis of the scaphognathite ventilatory pump in the shore crab *Carcinus maenas*. I. Work and power. *J. exp. Biol.* **113**, 55–68.
- MORRIS, S., BRIDGES, C. R. AND GRIESHABER, M. K. (1985). A new role for uric acid: modulator of haemocyanin oxygen affinity in crustaceans. *J. exp. Zool.* **235**, 135–139.
- MORTON, R. H. (1985). Two-dimensional short-term model of oxygen uptake kinetics. *J. appl. Physiol.* **58**, 1736–1740.
- PASQUIS, A., LACAISSE, A. AND DEJOURS, P. (1970). Maximal oxygen uptake in four species of small animals. *Respir. Physiol.* **9**, 298–309.

- PRIEDE, I. G. (1985). Metabolic scope in fishes. In *Fish Energetics: New Perspectives* (ed. P. Tytler and P. Calow), pp. 33–64. London, Sydney: Croom Helm.
- SCHMIDT-NIELSEN, K. (1984). *Scaling, Why is Animal Size so Important?* pp. 151–164. London: Cambridge University Press.
- SMATRESK, N. J. AND CAMERON, J. N. (1981). Post-exercise acid–base balance and ventilatory control in *Birgus latro*, the coconut crab. *J. exp. Zool.* **218**, 75–82.
- SMATRESK, N. J., PRESLAR, A. J. AND CAMERON, J. N. (1979). Post-exercise acid–base disturbance in *Gecarcinus lateralis*. *J. exp. Zool.* **210**, 205–210.
- SNEDECOR, G. W. AND COCHRAN, W. C. (1972). *Statistical Methods*. Iowa: Iowa State University Press.
- SOKAL, R. R. AND ROHLF, F. J. (1969). *Biometry*. San Francisco: Freeman Publications.
- TAYLOR, A. C. (1976). The respiratory responses of *Carcinus maenas* to declining oxygen tension. *J. exp. Biol.* **65**, 309–322.
- TAYLOR, E. W. (1982). Control and co-ordination of ventilation and circulation in crustaceans: responses to hypoxia and exercise. *J. exp. Biol.* **100**, 289–319.
- TAYLOR, E. W. AND BUTLER, P. J. (1978). Aquatic and aerial respiration in the shore crab, *Carcinus maenas* (L.), acclimated to 15°C. *J. comp. Physiol.* **127**, 315–323.
- TAYLOR, H. H. AND GREENAWAY, P. (1984). The role of the gills and branchiostegites in gas exchange in the bimodally breathing crab, *Holthuisana transversa*: evidence for a facultative change in the distribution of the respiratory circulation. *J. exp. Biol.* **111**, 103–121.
- THOMAS, S. P. (1975). Metabolism during flight in two species of bats, *Phyllostomus hastatus* and *Pteropus gouldii*. *J. exp. Biol.* **63**, 273–293.
- TRUCHOT, J. P. (1976a). Carbon dioxide combining properties of the blood of the shore crab *Carcinus maenas* (L.): CO<sub>2</sub>-dissociation curves and Haldane effect. *J. comp. Physiol.* **112**, 283–293.
- TRUCHOT, J. P. (1976b). Carbon dioxide combining properties of the blood of the shore crab *Carcinus maenas* (L.): carbon dioxide solubility coefficient and carbonic acid dissociation constants. *J. exp. Biol.* **64**, 45–57.
- TRUCHOT, J. P. (1980). Lactate increases the oxygen affinity of crab haemocyanin. *J. exp. Zool.* **214**, 205–208.
- WALDRON, F. M., TAYLOR, H. H. AND FORSTER, M. E. (1986). Acid–base disturbances following exercise in a high-shore crab, *Cyclograpsus lavauxi*. *N.Z. J. mar. freshwater Res.* **20**, 479–487.
- WHEATLY, M. G., MCMAHON, B. R., BURGREN, W. W. AND PINDER, A. W. (1986). Haemolymph acid–base, electrolyte and gas status during sustained voluntary activity in the land hermit crab *Coenobita compressus*. *J. exp. Biol.* **125**, 225–243.
- WILKENS, J. L., WILKES, P. R. H. AND EVANS, J. (1984). Analysis of the scaphognathite ventilatory pump in the short crab, *Carcinus maenas*. II. Pumping efficiency and metabolic cost. *J. exp. Biol.* **113**, 69–81.
- WOOD, C. M., MCMAHON, B. R. AND McDONALD, D. G. (1979). Respiratory gas exchange in the resting flounder, *Platichthys stellatus*: a comparison with other teleosts. *J. exp. Biol.* **78**, 167–179.
- WOOD, C. M. AND RANDALL, D. J. (1981a). Oxygen and carbon dioxide exchange during exercise in the land crab (*Cardisoma carnifex*). *J. exp. Zool.* **218**, 7–22.
- WOOD, C. M. AND RANDALL, D. J. (1981b). Haemolymph gas transport, acid–base regulation, and anaerobic metabolism during exercise in the land crab (*Cardisoma carnifex*). *J. exp. Zool.* **218**, 23–35.
